1                   **Stabilin-1 plays a protective role against *Listeria monocytogenes* infection**

2                   **through the regulation of cytokine and chemokine production and immune cell recruitment**

3  
4                   Rita Pombinho<sup>a,b</sup>, Jorge Pinheiro<sup>a,b</sup>, Mariana Resende<sup>a,c</sup>, Diana Meireles<sup>a,b</sup>, Sirpa Jalkanen<sup>d</sup>, Sandra  
5                   Sousa<sup>a,b</sup>, Didier Cabanes<sup>a,b\*</sup>

6  
7                   <sup>a</sup> Instituto de Investigação e Inovação em Saúde - i3S, Universidade do Porto, Porto, Portugal

8                   <sup>b</sup> Group of Molecular Microbiology, Instituto de Biologia Molecular e Celular - IBMC, Porto,  
9                   Portugal

10                  <sup>c</sup> Microbiology and Immunology of Infection, Instituto de Biologia Molecular e Celular - IBMC,  
11                  Porto, Portugal

12                  <sup>d</sup> MediCity Research Laboratory and Department of Medical Microbiology and Immunology,  
13                  University of Turku, Turku, Finland.

14  
15                  \* Corresponding author: [didier@ibmc.up.pt](mailto:didier@ibmc.up.pt)

16  
17                  Running title: Stabilin-1 contributes to *Listeria* clearance

## 30 **ABSTRACT**

31 Scavenger receptors are part of a complex surveillance system expressed by host cells to efficiently  
32 orchestrate innate immune response against bacterial infections. Stabilin-1 (STAB-1) is a scavenger  
33 receptor involved in cell trafficking, inflammation and cancer, however its role in infection remains to  
34 be elucidated. *Listeria monocytogenes* (*Lm*) is a major intracellular human food-borne pathogen  
35 causing severe infections in susceptible hosts. Using a mouse model of infection, we demonstrate  
36 here that STAB-1 controls *Lm*-induced cytokine and chemokine production and immune cell  
37 accumulation in *Lm*-infected organs. We show that STAB-1 also regulates the recruitment of myeloid  
38 cells in response to *Lm* infection and contributes to clear circulating bacteria. In addition, whereas  
39 STAB-1 appears to promote bacterial uptake by macrophages, infection by pathogenic *Listeria*  
40 induces the down regulation of STAB-1 expression and its delocalization from the host cell  
41 membrane.

42 We propose STAB-1 as a new SR involved in the control of *Lm* infection through the regulation of  
43 host defense mechanisms, a process that would be targeted by bacterial virulence factors to promote  
44 infection.

45

46

47 **KEYWORDS:** *Listeria*, Scavenger Receptors, STAB-1, innate immunity, infection

48

49

## 50 **Introduction**

51 *Listeria monocytogenes* (*Lm*) is a major human food-borne pathogen that causes listeriosis, which  
52 is highly prevalent among high-risk groups including immunocompromised people, elderly, pregnant  
53 women and neonates. Listeriosis is an overall public health concern associated with high  
54 hospitalization and mortality rates, being the most deadly food-borne infection in Europe [1].  
55 Manifestations of the disease range from a self-limiting febrile gastroenteritis to septicemia,  
56 meningitis and encephalitis [2]. The most severe aspects of the disease are related to the capacity  
57 of *Lm* to cross the intestinal, blood-brain and maternal-foetal barriers, evading the immune response,

58 multiplying within phagocytic and non-phagocytic cells and effectively disseminating throughout host  
59 tissues [3]. These properties are shaped by an arsenal of virulence factors [4].

60 The host innate immune response is critical to elicit an early defense towards *Lm*. The containment  
61 of infection requires both the participation of professional phagocytes that trap bacteria from target  
62 organs, and the activation of a number of pattern recognition receptors, including scavenger  
63 receptors (SRs) [5, 6]. SRs comprise a diverse and conserved family of proteins, able to bind to a  
64 wide range of ligands stimulating the removal of non-self and modified-self targets [7]. They  
65 contribute to maintain homeostasis and control pathogen infections, playing key functions in the  
66 antimicrobial host immune response [7, 8]. The role of SRs in *Lm* infection was first revealed for SR-  
67 A, SR-AI/II KO mice showing increased susceptibility to *Lm* infection and displaying increased  
68 hepatic granuloma formation [9]. Later, MARCO, CD36 and SR-BI were then shown to bind *Lm* and  
69 to modulate the immune response against *Lm* [10-12]. The first member of the Class H of SRs to be  
70 described was STABILIN-1 (STAB-1) [13]. It is a highly conserved type I transmembrane protein  
71 mainly expressed in sinusoidal endothelial cells of the spleen and liver, and on both afferent and  
72 efferent arms of the lymphatic vasculature, but also in subpopulations of monocytes/macrophages,  
73 and hematopoietic stem cells [13-15]. STAB-1 was implicated in lymphocyte adhesion and  
74 trafficking, angiogenesis and apoptotic cell clearance, therefore being crucial to maintain tissue  
75 homeostasis and resolving inflammation [16]. This SR has the ability to bind different ligands  
76 including modified low-density lipoproteins [17], phosphatidylserine expressed by apoptotic cells  
77 [18], secreted protein acidic and rich in cysteine (SPARC). Importantly, STAB-1 was previously found  
78 to bind Gram-positive and Gram-negative bacteria *in vitro* [19]. Furthermore, it is known that this  
79 receptor controls inflammatory activity, modulates T cell activation and also humoral immune  
80 response [20].

81 Here we address the role of STAB-1 in host defense against *Lm* infection and investigate the impact  
82 of STAB-1 deficiency on the host innate immune response against this bacterial pathogen. We reveal  
83 that STAB-1 KO mice display deregulated cytokine and chemokine expression, impaired recruitment  
84 of myeloid cells and increased susceptibility to *Lm* infection. In addition, whereas STAB-1 appears  
85 to promote bacterial uptake by macrophages, *Lm* infection induces the down regulation of STAB-1  
86 expression and its delocalization from the host cell membrane.

87

## 88 **Materials and Methods**

### 89 ***Bacteria and cells***

90 *Listeria monocytogenes* EGD (BUG 600) (*Lm*) and the non-pathogenic *Listeria innocua* (CLIP  
91 11262) (*Li*) were grown in Brain Heart Infusion (BHI) (BD-Difco) at 37°C. *Lm* EGD transformed with  
92 pNF8-GFP plasmid (*Lm* EGD<sub>GFP</sub>) was grown in BHI supplemented with 5 µg/ml erythromycin. Human  
93 acute monocytic leukemia cells, THP-1 (ATCC TIB-202), were maintained in Roswell Park Memorial  
94 Institute (RPMI) 1640 medium (Lonza) supplemented with 10% foetal bovine serum (FBS)  
95 (BioWest). Before bacterial infection, THP-1 cells were differentiated with 10 nM phorbol 12-  
96 myristate 13-acetate for 48 h [21]. Murine macrophages J774 A.1 (ATTC TIB-67) and Raw 264.7  
97 (ATTC TIB-71) were cultured in Dulbecco's modified Eagle medium (DMEM) (Lonza), supplemented  
98 with 10% FBS. Human umbilical vein endothelial cells (HUVECs) were isolated and maintained in  
99 M199 culture medium supplemented with 10% FBS, heparin at 100 µg/ml and endothelial cell growth  
100 supplement (ECGS) at 30 µg/ml.

101

### 102 ***Macrophage infection***

103 Macrophages were incubated for 30 min with: 100 µg/ml of fucoidan (Sigma-Aldrich), 50 µg/ml of  
104 Poly(I) or Poly(C) (Santa-Cruz-Biotechnology). Cells were infected for 30 min with exponential-phase  
105 bacteria at a multiplicity of infection (MOI) of 2 and treated with 20 µg/ml of gentamicin (Lonza) for  
106 60 min as described [22]. Raw macrophages were incubated with 5 µg/ml or 25 µg/ml of mouse-IgG  
107 (SC-2025) or anti-STAB-1 antibody (sc-98788) 1 h before bacterial infection at MOI of 50, during 30  
108 min or 20 min plus 10 min with 50 µg/ml of gentamicin. Cells were washed and lysed for CFU  
109 quantification.

110

### 111 ***Bone marrow-derived macrophages (BMDMs)***

112 Mouse femurs were removed and flushed with Hank's Buffered Salt Solution (HBSS-Lonza) as  
113 described [23]. Bone marrow cells were collected by centrifugation and cultured overnight in DMEM  
114 supplemented with 10 mM HEPES (Gibco), 1 mM sodium pyruvate (Lonza), 10% FBS and 10%  
115 L929 cell-conditioned medium (LCCM). Non-adherent cells were collected and seeded. Upon 4 days

116 of differentiation, 10% of LCCM was added and on day 7 the medium was renewed. At day 10, latex  
117 beads of 1  $\mu\text{m}$  (Invitrogen) (30 min of incubation) or exponential-phase bacteria at MOI 50 (20 min  
118 of infection plus 10 min with 50  $\mu\text{g/ml}$  gentamicin) were added. Macrophages were washed and lysed  
119 for CFU quantification or used for immunofluorescence staining.

120

### 121 **RNA techniques**

122 RNAs were extracted from non-infected and infected cells (TripleXtractor, GRISP), as recommended  
123 by the manufacturer. Purified RNAs were reverse-transcribed (iScript, Bio-Rad-Laboratories) and  
124 analysed by qPCR as described [24] or using specific primer probes (TaqMan). Gene expression  
125 data were analysed by comparative Ct method [25], normalized to *HPRT1* expression. For qualitative  
126 analysis, PCR was performed on cDNA (KAPA2G Mix, GRISP). Amplification products were  
127 resolved in 1% (w/v) agarose gel and analysed with GelDoc XR+ System (Bio-Rad Laboratories).  
128 Primers and probes are listed in Table S1.

129

### 130 **Immunofluorescence**

131 *Lm* EGD<sub>GFP</sub> infected BMDMs were fixed in 3% paraformaldehyde (15 min), quenched with 20 mM  
132 NH<sub>4</sub>Cl (1 h) and blocked with 1% BSA (sigma) in PBS (30 min). Cells were permeabilized with 0.1%  
133 Triton X-100 in PBS for 5 min and labelled with Alexa Fluor 647-conjugated phalloidin (Invitrogen),  
134 during 45 min on the dark. Cells were washed and slide preparations were mounted and dried at  
135 room temperature. Images were captured with an Olympus BX53 fluorescence microscope. The  
136 percentage of cells with intracellular bacteria or beads, and the number of intracellular bacteria or  
137 beads per cell were calculated. At least 300 cells were analysed for each sample in three  
138 independent experiments. Non-infected and *Lm*-infected HUVEC were incubated for 1 h with primary  
139 antibody rabbit anti-STAB-1 (1:100, Millipore), diluted in 0.2% saponin (Merck) supplemented with  
140 1% BSA. Cells were washed in 0.2% saponin and incubated 45 min with secondary anti-rabbit Alexa  
141 488 antibody (Invitrogen). DNA was counterstained with DAPI (Sigma) and actin labelled with  
142 TRITC-conjugated phalloidin. Images were collected with an Olympus BX53 fluorescence  
143 microscope and processed using ImageJ.

144

145 ***Cell fractionation and Immunoblotting***

146 Cytoplasmic and membrane fractions from non-infected and *Lm*-infected cells were obtained using  
147 the Subcellular Protein Fractionation kit (Thermo Scientific). Cell samples and homogenized spleens  
148 were diluted in Laemmli buffer, resolved by SDS-PAGE on 8% gels. Samples were transferred onto  
149 nitrocellulose membrane (Bio-Rad Laboratories), blocked and blotted with rabbit anti-STAB-1 (1:500,  
150 Millipore), followed by HRP-conjugated goat anti-rabbit IgG (1:2000, P.A.R.I.S). Signals were  
151 detected using ECL (Thermo-Scientific) and digitally acquired in a ChemiDoc XRS+ system (Bio-  
152 Rad Laboratories). Signal intensity was quantified using Image J.

153

154 ***Cytokine ELISA***

155 Lysis buffer 2x (200 mM Tris, 300 mM NaCl, 2% triton, pH 7.4) and Complete proteinase inhibitor  
156 (Roche) were added to homogenized organs for 30 min on ice. Supernatants were collected upon  
157 centrifugation and stored (-80°C). Mouse serum was recovered after blood centrifugation. Cytokine  
158 production was determined using murine ELISA kit (eBioscience).

159

160 ***Flow cytometry***

161 Mouse spleens were collected in ice-cold storage solution (PBS 2% FBS) and single-cell  
162 suspensions prepared using cell strainers (BD-Falcon). Cells were washed upon red blood cells lysis  
163 (150 mM NH<sub>4</sub>Cl, 10 mM KHCO<sub>3</sub>, pH 7.2 in H<sub>2</sub>O) and cell viability was assessed by trypan blue (Life-  
164 technologies) exclusion method. Peritoneal cells were collected by washing peritoneal cavities with  
165 5 ml of storage solution, pelleted by centrifugation, washed and cell viability was assessed. Cells  
166 were labelled with brilliant violet 510-conjugated anti-CD11b, clone M1/70; BV 421-conjugated anti-  
167 CD11c, clone N418; allophycocyanin (APC)-conjugated anti-Ly6G, clone 1A8; APC with cyanin-7  
168 (APC/Cy7)-conjugated anti-F4/80, clone BM8; and phycoerythrin (PE)-conjugated anti-Ly6C, clone  
169 HK1.4 (BioLegend). Data were acquired in a FACS Canto II flow cytometer (BD-Biosciences) and  
170 analysed using FlowJo software (TreeStar Inc.). To determine cell numbers, event number for each  
171 cell population was normalized to the total cell number.

172

173 ***Animal infections***

174 STABILIN-1 full knock-out (STAB-1 KO) mice and their wild-type (WT) littermates, both with a  
175 C57BL/6N, 129SvJ mixed background have been described [26]. Infections were done as described  
176 [27]. Briefly, intravenous infections were performed through the tail vein with  $5 \times 10^5$  colony-forming  
177 units (CFUs) in PBS. Mice were euthanized 72h post-infection, spleens and livers were aseptically  
178 collected and CFUs counted. Blood was recovered from mice heart. Mouse survival was assessed  
179 upon intravenous infection of  $10^5$  CFUs. Animals were intraperitoneally injected with  $10^5$  CFUs (*Lm*)  
180 or 5 mg/kg of LTA from *Staphylococcus aureus* (L2515 Sigma) in PBS and euthanized 6h or 24h  
181 later. Animal procedures followed European Commission (directive 2010/63/EU) and Portuguese  
182 (Decreto-Lei 113/2013) guidelines and were approved by the IBMC Ethics Committee and Direção  
183 Geral de Veterinária (license 015301).

184

## 185 **Statistics**

186 Statistics were carried out with Prism (GraphPad), using unpaired two-tailed Student's *t*-test to  
187 compare means of two groups, and one-way ANOVA with Tukey's post-hoc test for pairwise  
188 comparison of means from more than two groups, or with Dunnett's post-hoc test for comparison of  
189 means relative to the mean of a control group.

190

## 191 **Results**

### 192 ***Scavenger Receptors are required for Lm uptake by macrophages***

193 To evaluate the overall role of SRs in *Lm* uptake by eukaryotic cells, we chemically saturated SRs  
194 using different pleiotropic compounds (fucoidan, Poly (I)) known to inhibit SRs [28], before *Lm*  
195 infection of human (THP-1) macrophages. Pre-treatment of THP-1 cells with fucoidan severely  
196 impaired *Lm* uptake when compared to non-treated cells (Figure 1A). In addition, the number of  
197 intracellular bacteria was also reduced upon SR saturation with Poly (I), but not with its  
198 corresponding negative control Poly (C) (Figure 1A). In agreement, pre-treatment of murine  
199 macrophage-like cells (Raw and J774 cell lines) with fucoidan also compromised *Lm* uptake (Figure  
200 1B). These data suggested a role for SRs in *Lm* uptake by macrophages.

201 To identify SRs potentially involved in *Lm* uptake by macrophages, we assessed SR expression  
202 profiles by analysing total RNAs isolated from human and murine macrophage cell lines. Our

203 analysis revealed that, although some of the selected SRs appeared broadly expressed, each cell  
204 line presented a specific SR expression profile (Figure 1C). In the tested conditions, *SR-A*, *SRCL*,  
205 *SREC*, *LOX1* and *STAB-1* appeared to be expressed in all cell lines. *SR-A* was previously proposed  
206 to play a crucial role in host defense against *Lm* infection [9]. Interestingly, *STAB-1* was previously  
207 implicated in lymphocyte transmigration and apoptotic cell clearance [16], and shown to bind Gram-  
208 positive and Gram-negative bacteria *in vitro* [19]. Since the involvement of *STAB-1* in infectious  
209 processes was never assessed so far, we further explore its potential role on *Lm* infection.

210

### 211 ***STAB-1 is required for Lm uptake by macrophages***

212 During infection, systemic bacteria are sequestered by phagocytes both in the liver and spleen [29].  
213 SRs are expressed by macrophages and may function as phagocytic receptors for bacteria [19].  
214 Aiming at understanding the role of *STAB-1* in *Lm* uptake, we pre-incubated Raw macrophages with  
215 anti-IgG (negative control) or anti-*STAB-1* antibody before *Lm* infection. While the percentage of  
216 adherent bacteria was similar between IgG- and anti-*STAB-1* treated cells, the percentage of  
217 intracellular *Lm* diminished upon macrophage treatment with anti-*STAB-1* antibody (Figure 2A).  
218 These data suggest that saturating *STAB-1* on the surface of macrophages reduces *Lm* uptake. To  
219 further address the role of *STAB-1* in *Lm* uptake by macrophages, bone marrow-derived  
220 macrophages (BMDMs) from both WT and *STAB-1* KO mice were infected with *Lm*. As compared  
221 to WT, *STAB-1* KO macrophages displayed decreased numbers of intracellular *Lm* (Figure 2B).  
222 Immunofluorescence quantifications of the percentage of infected cells and the number of  
223 intracellular bacteria per cell confirmed the reduced capacity of *STAB-1* KO macrophages to uptake  
224 *Lm* (Figure 2C). *STAB-1* KO macrophages also displayed a slight phagocytosis defect of non-  
225 pathogenic *Listeria* (*Listeria innocua* - *Li*) [30], as well as of latex beads (Figure 2D). However this  
226 defect appeared more pronounced for *Lm* than for *Li* or beads. *STAB-1* appears thus be involved in  
227 the uptake of foreign bodies by macrophages.

228

### 229 ***STAB-1 has a protective role against Lm infection***



230 To investigate the contribution of STAB-1 during *Lm* systemic infection *in vivo*, WT and STAB-1 KO  
231 mice were intravenously infected with *Lm*. Three days later, mice were euthanized and bacterial  
232 loads in spleens and livers were quantified. Bacterial numbers appeared significantly higher in the  
233 organs of STAB-1 KO mice (Figure 3A), demonstrating a role for STAB-1 in the control of *Lm*  
234 infection. To test if this defect in the control of infection may lead to increased mortality, mice were  
235 intravenously infected with a lower dose of *Lm* and survival was monitored over time. Whereas WT  
236 mice survived throughout the infection, mortality in STAB-1 KO mice reached 80% by day 18 (Figure  
237 3B).

238 Altogether, our data indicate that STAB-1 promotes protection against *Lm* infection.

239

240 ***STAB-1 is required for an efficient inflammatory response and immune cell accumulation in***  
241 ***Lm-infected spleens***

242 Mouse infection by *Lm* induces a robust innate inflammatory response that restricts bacterial growth  
243 prior to the development of protective T cell responses. Early protective immunity against *Lm* relies  
244 on the production and balance of pro-inflammatory cytokines, such as TNF- $\alpha$  and IL-6, and anti-  
245 inflammatory cytokines, such as IL-10 [31]. To analyse the potential role for STAB-1 in the production  
246 of microbicidal mediators in response to *Lm* infection, WT and STAB-1 KO mice were intravenously  
247 infected with *Lm*. The production of cytokines in the spleens, livers and sera of *Lm*-infected mice  
248 was evaluated by ELISA three days post-infection. As compared to WT animals, infected STAB-1  
249 KO mice produced lower levels of TNF- $\alpha$ , IL-6 and IL-10 (Figure 4A). Importantly, this reduction of  
250 the cytokine levels between WT and STAB-1 KO mice is not observed in absence of infection (Figure  
251 S1). These results indicate that STAB-1 plays a role in the coordinated cytokine production elicited  
252 by *Lm* infection in targeted mouse organs.

253 *Lm* entering the bloodstream are rapidly taken up by various myeloid cells in tissues. In the spleen,  
254 bacteria are filtered by resident myeloid cells, including dendritic cells and professional phagocytes  
255 [32]. Inflammatory stimuli also induce the recruitment of inflammatory macrophages to infected  
256 tissues [33]. As STAB-1 appears to regulate the production of inflammatory cytokines in response to  
257 *Lm* infection, in particular in the spleen, we hypothesized that STAB-1 could impact innate immune  
258 cells recruitment to the infected spleen, a major site of bacteria replication. To test this hypothesis,

259 WT and STAB-1 KO mice were intravenously infected with *Lm*, and three days post-infection, single-  
260 cell spleen suspensions were analysed regarding myeloid cell populations by flow cytometry. As  
261 compared to WT infected mice, *Lm*-infected STAB-1 KO mice showed a clear defect on myeloid  
262 CD11b<sup>int/hi</sup> cells, which resulted from the diminished number of neutrophils (CD11b<sup>hi</sup>Ly6G<sup>hi</sup>) and  
263 macrophages (CD11b<sup>hi</sup>CD11c<sup>lo</sup>) (Figure 4B). Interestingly, within the macrophage population, the  
264 number of inflammatory macrophages (CD11b<sup>hi</sup>Ly6C<sup>hi</sup>) was also reduced in infected STAB-1 KO  
265 animals (Figure 4B). In absence of infection, spleens of WT and STAB-1 KO mice showed  
266 comparable myeloid cell populations (Figure S2). Taken together, these data show that STAB-1 is  
267 important in controlling the recruitment of neutrophils and macrophages to the spleen of *Lm*-infected  
268 mice.

269 The migration and positioning of immune cells in tissues in response to infection is mainly controlled  
270 by chemokines [34]. We thus analysed the expression of neutrophil- and monocyte-attracting  
271 chemokines in *Lm*-infected murine organs. In infected STAB-1 KO mouse livers, the expression of  
272 all chemokines tested was decreased as compared to WT infected mice (Figure 4C, left graph). In  
273 infected spleens, the expression of CCL7 and CXCL10 was also decreased in STAB-1 KO mouse  
274 spleens, whereas the expression of CCL2 was increased as compared to WT (Figure 4C, right  
275 graph). Differences observed between organs might be the result of niche/microenvironment  
276 disparities. Altogether, these results indicate a role for STAB-1 in the recruitment of immune cells to  
277 *Lm*-infection sites possibly through the expression control of attracting chemokines. These data also  
278 corroborate the role of CCL7 and CXCL10 in the recruitment of inflammatory monocytes to the  
279 spleen.

280

### 281 ***STAB-1 is important for early myeloid cells recruitment in response to *Lm* infection***

282 The early recruitment of immune cells to infected tissues was shown to be crucial for an effective  
283 innate immune response against *Lm* [33]. To evaluate the role of STAB-1 in the early trafficking of  
284 myeloid cells to the site of *Lm* infection, WT and STAB-1 KO mice were intraperitoneally infected  
285 with *Lm*. Exudate cells from the peritoneal cavity were recovered 6h or 24h post-infection to evaluate  
286 myeloid cell populations by flow cytometry. When compared to non-infected mice, *Lm* infection  
287 appeared to trigger the recruitment of cells to the focus of infection, mainly neutrophils

288 (CD11b<sup>hi</sup>Ly6G<sup>hi</sup>) and inflammatory macrophages (CD11b<sup>hi</sup>Ly6C<sup>hi</sup>) (Figures 5A-C). While similar cell  
289 populations were detected in non-infected WT and STAB-1 KO mice (Figure 5A), we observed a  
290 defect recruitment of myeloid cells in STAB-1 KO when compared to WT mice, both at 6h and 24h  
291 after *Lm* infection (Figures 5B-C).

292 Lipoteichoic acids are components of Gram-positive bacteria and potent inducers of inflammation.  
293 They stimulate immune cells and induce the migration of myeloid cells to the mouse abdominal cavity  
294 when injected intraperitoneally [35, 36]. We used this experimental model to confirm the involvement  
295 of STAB-1 in the recruitment of innate immune cells to the infection site. Purified LTA were  
296 intraperitoneally injected into WT and STAB-1 KO mice and, 6h post-stimulation, exudate cells from  
297 the peritoneal cavity were recovered to evaluate myeloid cell populations. In response to LTA, STAB-  
298 1 KO mice showed a significant reduction in the myeloid cell (CD11b<sup>int/hi</sup>) population when compared  
299 to WT mice, which correlates to a decreased recruitment of neutrophils (CD11b<sup>hi</sup>Ly6G<sup>hi</sup>),  
300 macrophages (CD11b<sup>hi</sup>CD11c<sup>lo</sup>) and inflammatory macrophages (CD11b<sup>hi</sup>Ly6C<sup>hi</sup>) (Figure 5D).  
301 Altogether, these results indicate that, *in vivo*, STAB-1 potentiates the recruitment of immune cells  
302 to the infection site upon an inflammatory stimulus.

303

#### 304 ***STAB-1 expression is decreased and re-localized in response to *Lm* infection***

305 Since STAB-1 appeared to restrain *Lm* infection by regulating cytokine and chemokine production  
306 and controlling myeloid cell recruitment, we investigated the potential impact of *Lm* infection on  
307 STAB-1 expression. We analysed *STAB-1* expression in murine macrophage-like cells (J774) in  
308 response to *Lm* infection and showed a slight decrease of *STAB-1* expression in infected as  
309 compared to non-infected macrophages (Figure 6A). As observed in macrophage cell lines, *Lm*  
310 infection also induced the down-regulation of STAB-1 expression in mouse BMDMs at the RNA and  
311 protein level (Figure 6A and 6B). Interestingly, this down-regulation of STAB-1 expression in BMDMs  
312 was only observed with pathogenic *Listeria* (*Lm*) and not with the non-pathogenic species (*Li*) (Figure  
313 6A and 6B).

314 As we showed that STAB-1 is required for an efficient immune response during *Lm* infection of  
315 mouse spleens, we thus assessed the impact of *Lm* infection on STAB-1 expression *in vivo*, in  
316 splenic tissue. The analysis indicated that *Lm* infection also induced a large decrease of STAB-1

317 expression in infected mouse tissues (Figure 6C). In the spleen, STAB-1 is not expressed by splenic  
318 macrophages but mainly by endothelial cells [13] that were shown to be active participants in the  
319 inflammatory response during *Lm* infection [37]. Therefore, we evaluated whether *Lm* infection could  
320 impact STAB-1 expression on endothelial cells (HUVECs) and showed again a significant decrease  
321 of STAB-1 levels in infected cells (Figure 6D). Immunofluorescence analysis corroborated the down-  
322 regulation of STAB-1 expression upon *Lm* infection of endothelial cells (Figure 6E). In addition, by  
323 microscopy, we also observed a de-localization of STAB-1 from the host cell membrane upon  
324 infection (Figure 6E). This was further confirmed by cell fractionation that showed a significant  
325 reduction of membrane STAB-1 in *Lm*-infected HUVECs when compared to non-infected cells  
326 (Figure 6F).

327 Together, these results indicate that infection by pathogenic *Listeria* induces a down-regulation of  
328 STAB-1 expression in infected cells and tissues. This down-regulation is accompanied by a de-  
329 localization of STAB-1 from the host cell membrane.

330

## 331 **Discussion**

332 Scavenger receptors (SRs) are transmembrane cell surface glycoproteins restricted to  
333 macrophages, dendritic cells, endothelial cells and a few other cell types [38]. Whereas SRs were  
334 initially defined by their ability to bind modified low-density lipoproteins, several SRs were since  
335 demonstrated to play an important role in innate immune defenses [39].

336 Here, we show for the first time the important role of the SR STAB-1 in the host protection against  
337 bacterial infection. We demonstrate that, during an infection by *Listeria monocytogenes* (*Lm*), STAB-  
338 1 is not only required for bacterial uptake by macrophages, but also for an efficient inflammatory  
339 response, immune cell accumulation, and early myeloid cells recruitment to the infection site.  
340 Interestingly, we also show that infection by pathogenic *Listeria* induces the down-regulation of  
341 STAB-1 expression and its de-localization from the cell membrane, suggesting a bacterial active  
342 virulence process targeting STAB-1 aiming to promote infection. STAB-1 appears thus as a new  
343 important player in the host protection against a major Gram-positive food-borne pathogen.

344 SRs were previously shown to represent an important part of the innate immune defense, in  
345 particular by acting as phagocytic receptors for microorganisms [40-42]. In addition, STAB-1 was  
346 previously found to bind Gram-positive and Gram-negative bioparticles *in vitro* [19], and was  
347 described to be a phagocytic receptor mediating efferocytosis by recognizing phosphatidylserine on  
348 apoptotic cells [43]. We show here the reduced ability of STAB-1 KO macrophages to uptake not  
349 only *Lm*, but also non-pathogenic bacteria and beads. This could suggest a role for STAB-1 in the  
350 general phagocytic process. However, it was previously documented that antibody blockade or  
351 absence of STAB-1 is sufficient to skew macrophages from an anti-inflammatory to a more pro-  
352 inflammatory phenotype [17], these later being inherently less phagocytic for *Lm* or latex beads than  
353 their anti-inflammatory counterparts [44]. This could be responsible, at least in part, for the decreased  
354 phagocytic capacity observed for STAB-1 KO macrophages.

355 We report here that STAB-1 contributes in the host response against *Lm* infection by controlling  
356 cytokine and chemokine production, thus controlling myeloid cell recruitment. SRs are strong players  
357 in the regulation of inflammation, such is the case of SR-A in *Neisseria meningitidis* and  
358 *Porphyromonas gingivalis* infections [45, 46] or CD36 in response to *Staphylococcus aureus* [47].  
359 STAB-1 was previously shown to control the activation of several pro-inflammatory cytokines in  
360 human monocytes [48]. Here, we show that infected STAB-1 KO mice produced reduced serum,  
361 liver and splenic levels of IL-6 and TNF- $\alpha$  as compared to WT mice, suggesting that STAB-1  
362 participates in the regulation of the inflammatory cytokine response in *Lm*-targeted mouse organs  
363 upon infection. In agreement, IL-6- and TNF- $\alpha$ -deficient mice were shown to be more susceptible to  
364 *Lm* infection, with increased bacterial burden in the spleen and liver, and deficient neutrophil  
365 recruitment into the blood [49, 50]. Surprisingly, we also observed an IL-10 decreased expression in  
366 STAB-1 KO mice upon *Lm* infection. IL-10 is a potent inhibitor of innate immunity and IL-10 deficiency  
367 was shown to improve resistance to *Lm* infection [51].

368 We show here that STAB-1 appears as an important regulator of the pro-/anti-inflammatory cytokine  
369 balance in response to *Lm* infection. *Lm* uses a balance of pro- and anti-inflammatory mechanisms  
370 to promote infection while inducing little inflammation in the host, both at the intestinal level and  
371 systemically [52]. In a rodent model of intestinal infection, differential induction of pro- or anti-  
372 inflammatory responses depending on the cell type used for entry were observed [53]. Thus a picture

373 emerges that the modulation of pro- and anti-inflammatory properties at the cellular level has  
374 important consequences for the course of infection when monitored in the complex host  
375 environment. Whereas STAB-1 was previously proposed as an immunosuppressive molecule,  
376 suggesting that STAB-1 may dampen pro-inflammatory reactions *in vivo* [48], our results rather tend  
377 to indicate a pro-inflammatory role for STAB-1 during *Lm* infection. In the context of sepsis, where  
378 the pro-inflammatory response predominates, STAB-1 was previously proposed to be both an  
379 immunosuppressive player to down-regulate hyper-inflammation at early stages and to act as a  
380 vascular barrier keeper in later stages of sepsis. STAB-1 could thus appear as a regulator of  
381 inflammatory processes, acting both as a pro- and anti-inflammatory molecule depending of the  
382 context and localization in the host.

383 Our findings also indicate that STAB-1 plays a role in the recruitment of myeloid cells in infected  
384 organs, a recruitment that appears to be dependent on chemokine expression, in particular CXCL10  
385 and CCL7. CXCL10 was previously involved in immune cell migration, differentiation and activation  
386 [54], and is induced by TNF- $\alpha$  [55]. The reduced levels of CXCL10 in STAB-1 KO mice upon *Lm*  
387 infection might thus correlate with the concomitant decreased expression of TNF- $\alpha$ . Interestingly,  
388 CXCL10 has been shown to have direct antibacterial properties similar to  $\alpha$ -defensins, in particular  
389 against *Lm* [56]. During *Lm* infection, the recruitment of inflammatory macrophages from bone  
390 marrow to sites of microbial infection was shown to be dependent on CCR2, a chemokine receptor  
391 that responds to CCL2 and CCL7 [57]. In our experimental model, CCL7 seems to play a more  
392 prominent role in the STAB-1-dependent recruitment of myeloid cells to *Lm* infected organs.  
393 However, the slight increase of CCL2 expression observed in the spleen of *Lm*-infected STAB-1 KO  
394 mice could also suggest a role of STAB-1 in myeloid cell chemotaxis.

395 We show that the deficiency on pro-inflammatory cytokine production and the defect on myeloid cell  
396 recruitment, which are crucial for the initial control of bacterial replication, lead to higher bacterial  
397 loads in the spleen and liver of STAB-1 KO mice. Neutrophils and macrophages, which are effective  
398 microbicidal cells, are among the first cells involved in the *Lm*-immune response. Mice deficient for  
399 these cells present increased bacterial burden and mortality [58]. The reduced capacity of STAB-1  
400 KO mice to fight *Lm* infection appears thus to be more related to a deficiency in the recruitment of  
401 myeloid cells to target organs, than to a killing deficiency. In agreement, STAB-1, which was shown

402 to be absent from all splenic macrophages, including red pulp, marginal zone and metallophilic  
403 macrophages, is solely expressed by the vascular endothelium [59], and is known to be involved in  
404 the transmigration of immune cells [14, 15]. Nevertheless, impaired control of the infection by STAB-  
405 1 KO mice may not be only due to reduced myeloid cell recruitment to the sites of infection. STAB-  
406 1 could be required for the proper migration, position and function of other immune cells, in particular  
407 CD8 $\alpha^+$  dendritic cells of the splenic marginal zone that were shown to be an obligate cellular entry  
408 point for a productive infection by *Lm* [60]. However, it was previously shown that the frequencies of  
409 splenic CD4+ and CD8+ T cells were comparable between wildtype and STAB-1 KO mice [20]. Our  
410 work focuses on the importance of STAB-1 in the early immune response of *Lm*, but further studies  
411 need to be performed to understand whether the deficiency of STAB-1 in the context of *Lm* infection  
412 interferes with T cell priming and the generation of T cell memory.

413 Whereas STAB-1 appears as an important player in the host protection against *Lm*, we also show  
414 that infection by this bacterial pathogen induces a decreased expression of STAB-1 in macrophages  
415 and endothelial cells but also *in vivo* in infected mice spleen, which is a major target organ for *Lm*  
416 replication. The expression of some other SRs, such as SR-A, MARCO and LOX-1, was also  
417 reported to be modulated by microbial infection, either favoring host immune response or promoting  
418 pathogen survival [45, 61, 62]. In particular, a marked expression of MARCO was observed in  
419 response to *Leishmania major* and *Lm* infections [10, 63]. Interestingly, we also found that *Lm*  
420 infection leads to a delocalization of STAB-1 from the membrane of endothelial cells. Importantly,  
421 the down-regulation of STAB-1 expression was not observed with the nonpathogenic specie *Listeria*  
422 *innocua*, that essentially differs from *Lm* by the absence of major virulence factors [30]. This suggests  
423 an active mechanism driven by *Lm* virulence factors to control STAB-1 expression/localization,  
424 diminish host protective responses and promote infection. However, the identification of the specific  
425 virulence factors potentially involved in this process requires further investigation.

426 Here, we highlight for the first time that STAB-1 plays a protective role during *Lm* infection. By  
427 regulating the inflammatory response and the recruitment of myeloid cells, STAB-1 appears as a  
428 new SR with an important role for the host response against *Lm* infection. Amplifying STAB-1-  
429 mediated host defenses may represent an innovative strategy against Gram-positive pathogens.

430



431 **Acknowledgements**

432 We thank Rui Appelberg for PhD co-supervision of R.P. and J.P., for helpful discussions and for  
433 critical reading of this manuscript.

434

435 **Disclosure statement**

436 The authors declare no conflict of interest.

437

438 **Funding**

439 This work was funded by National Funds through FCT—Fundação para a Ciência e a Tecnologia,  
440 I.P., under the project UIDB/04293/2020. R.P. and J.P. were supported by doctoral fellowships from  
441 FCT (SFRH/BD/89542/2012 and SFRH/BD/86871/2012) through FCT/MEC co-funded by QREN  
442 and POPH (Programa Operacional Potencial Humano). S.S. was supported by the FCT in the  
443 framework of the CEEC-Institutional 2017 program. The authors acknowledge the support of i3S  
444 Scientific Platforms: Advanced Light Microscopy, member of the national infrastructure PPBI-  
445 Portuguese Platform of BioImaging (supported by POCI-01-0145-FEDER-022122), and  
446 Translational Cytometry Unit (Tracy).

447

448 **References**

449

- 450 [1] EFSA. The European Union summary report on trends and sources of zoonoses, zoonotic agents  
451 and food-borne outbreaks in 2016. 2017.
- 452 [2] Swaminathan B, Gerner-Smidt P. The epidemiology of human listeriosis. *Microbes Infect.*  
453 2007;9:1236-43.
- 454 [3] Cossart P. Illuminating the landscape of host-pathogen interactions with the bacterium *Listeria*  
455 *monocytogenes*. *P Natl Acad Sci USA.* 2011;108:19484-91.
- 456 [4] Camejo A, Carvalho F, Reis O, et al. The arsenal of virulence factors deployed by *Listeria*  
457 *monocytogenes* to promote its cell infection cycle. *Virulence.* 2011;2:379-94.
- 458 [5] Gordon S. Pattern recognition receptors: Doubling up for the innate immune response. *Cell.*  
459 2002;111:927-30.
- 460 [6] Tam MA, Wick MJ. Dendritic cells and immunity to *Listeria*: TipDCs are a new recruit. *Trends*  
461 *Immunol.* 2004;25:335-9.



- 462 [7] Areschoug T, Gordon S. Scavenger receptors: role in innate immunity and microbial  
463 pathogenesis. *Cell Microbiol.* 2009;11:1160-9.
- 464 [8] Pombinho R, Sousa S, Cabanes D. Scavenger Receptors: Promiscuous Players during Microbial  
465 Pathogenesis. *Crit Rev Microbiol.* 2018;44:685-700.
- 466 [9] Ishiguro T, Naito M, Yamamoto T, et al. Role of macrophage scavenger receptors in response to  
467 *Listeria monocytogenes* infection in mice. *Am J Pathol.* 2001;158:179-88.
- 468 [10] Ito S, Naito M, Kobayashi Y, et al. Roles of a macrophage receptor with collagenous structure  
469 (MARCO) in host defense and heterogeneity of splenic marginal zone macrophages. *Arch Histol*  
470 *Cytol.* 1999;62:83-95.
- 471 [11] Pfeiler S, Khandagale AB, Magenau A, et al. Distinct surveillance pathway for immunopathology  
472 during acute infection via autophagy and SR-BI. *Sci Rep.* 2016;6:34440.
- 473 [12] Vishnyakova TG, Kurlander R, Bocharov AV, et al. CLA-1 and its splicing variant CLA-2 mediate  
474 bacterial adhesion and cytosolic bacterial invasion in mammalian cells. *P Natl Acad Sci USA.*  
475 2006;103:16888-93.
- 476 [13] Goerdts S, Walsh LJ, Murphy GF, et al. Identification of a novel high molecular weight protein  
477 preferentially expressed by sinusoidal endothelial cells in normal human tissues. *J Cell Biol.*  
478 1991;113:1425-37.
- 479 [14] Karikoski M, Irtala H, Maksimow M, et al. Clever-1/Stabilin-1 regulates lymphocyte migration  
480 within lymphatics and leukocyte entrance to sites of inflammation. *Eur J Immunol.* 2009;39:3477-87.
- 481 [15] Shetty S, Weston CJ, Oo YH, et al. Common lymphatic endothelial and vascular endothelial  
482 receptor-1 mediates the transmigration of regulatory T cells across human hepatic sinusoidal  
483 endothelium. *J Immunol.* 2011;186:4147-55.
- 484 [16] Kzhyshkowska J. Multifunctional receptor stabilin-1 in homeostasis and disease.  
485 *ScientificWorldJournal.* 2010;10:2039-53.
- 486 [17] Rantakari P, Patten DA, Valtonen J, et al. Stabilin-1 expression defines a subset of  
487 macrophages that mediate tissue homeostasis and prevent fibrosis in chronic liver injury. *P Natl*  
488 *Acad Sci USA.* 2016;113:9298-303.
- 489 [18] Park SY, Jung MY, Lee SJ, et al. Stabilin-1 mediates phosphatidylserine-dependent clearance  
490 of cell corpses in alternatively activated macrophages. *Journal of cell science.* 2009;122:3365-73.
- 491 [19] Adachi H, Tsujimoto M. FEEL-1, a novel scavenger receptor with in vitro bacteria-binding and  
492 angiogenesis-modulating activities. *The Journal of biological chemistry.* 2002;277:34264-70.
- 493 [20] Dunkel J, Viitala M, Karikoski M, et al. Enhanced Antibody Production in Clever-1/Stabilin-1-  
494 Deficient Mice. *Front Immunol.* 2018;9:2257.
- 495 [21] Park EK, Jung HS, Yang HI, et al. Optimized THP-1 differentiation is required for the detection  
496 of responses to weak stimuli. *Inflamm Res.* 2007;56:45-50.
- 497 [22] Carvalho F, Atilano ML, Pombinho R, et al. L-Rhamnosylation of *Listeria monocytogenes* Wall  
498 Teichoic Acids Promotes Resistance to Antimicrobial Peptides by Delaying Interaction with the  
499 Membrane. *PLoS pathogens.* 2015;11:e1004919.

- 500 [23] Pombinho R, Camejo A, Vieira A, et al. *Listeria monocytogenes* CadC Regulates Cadmium  
501 Efflux and Fine-tunes Lipoprotein Localization to Escape the Host Immune Response and Promote  
502 Infection. *The Journal of infectious diseases*. 2017;215:1468-79.
- 503 [24] Pinheiro J, Reis O, Vieira A, et al. *Listeria monocytogenes* encodes a functional ESX-1 secretion  
504 system whose expression is detrimental to in vivo infection. *Virulence*. 2016;1-12.
- 505 [25] Livak KJ, Schmittgen TD. Analysis of relative gene expression data using real-time quantitative  
506 PCR and the 2<sup>-</sup>(Delta Delta C(T)) Method. *Methods*. 2001;25:402-8.
- 507 [26] Karikoski M, Marttila-Ichihara F, Elima K, et al. Clever-1/stabilin-1 controls cancer growth and  
508 metastasis. *Clin Cancer Res*. 2014;20:6452-64.
- 509 [27] Cabanes D, Lecuit M, Cossart P. Animal models of *Listeria* infection. *Curr Protoc Microbiol*.  
510 2008;Chapter 9:Unit9B 1.
- 511 [28] Cui YQ, Luo DZ, Wang XM. [Fucoidan: advances in the study of its anti-inflammatory and anti-  
512 oxidative effects]. *Yao Xue Xue Bao*. 2008;43:1186-9.
- 513 [29] van Furth R, Cohn ZA, Hirsch JG, et al. The mononuclear phagocyte system: a new  
514 classification of macrophages, monocytes, and their precursor cells. *Bull World Health Organ*.  
515 1972;46:845-52.
- 516 [30] Glaser P, Frangeul L, Buchrieser C, et al. Comparative genomics of *Listeria* species. *Science*.  
517 2001;294:849-52.
- 518 [31] Witte CE, Archer KA, Rae CS, et al. Innate immune pathways triggered by *Listeria*  
519 *monocytogenes* and their role in the induction of cell-mediated immunity. *Adv Immunol*.  
520 2012;113:135-56.
- 521 [32] Williams MA, Schmidt RL, Lenz LL. Early events regulating immunity and pathogenesis during  
522 *Listeria monocytogenes* infection. *Trends Immunol*. 2012;33:488-95.
- 523 [33] Serbina NV, Pamer EG. Monocyte emigration from bone marrow during bacterial infection  
524 requires signals mediated by chemokine receptor CCR2. *Nat Immunol*. 2006;7:311-7.
- 525 [34] Mahalingam S, Karupiah G. Chemokines and chemokine receptors in infectious diseases.  
526 *Immunol Cell Biol*. 1999;77:469-75.
- 527 [35] Bhakdi S, Klonisch T, Nuber P, et al. Stimulation of monokine production by lipoteichoic acids.  
528 *Infect Immun*. 1991;59:4614-20.
- 529 [36] Miyazaki S, Ishikawa F, Fujikawa T, et al. Intraperitoneal injection of lipopolysaccharide induces  
530 dynamic migration of Gr-1<sup>high</sup> polymorphonuclear neutrophils in the murine abdominal cavity. *Clin*  
531 *Diagn Lab Immunol*. 2004;11:452-7.
- 532 [37] Drevets DA, Sawyer RT, Potter TA, et al. *Listeria monocytogenes* infects human endothelial  
533 cells by two distinct mechanisms. *Infect Immun*. 1995;63:4268-76.
- 534 [38] Murphy JE, Tedbury PR, Homer-Vanniasinkam S, et al. Biochemistry and cell biology of  
535 mammalian scavenger receptors. *Atherosclerosis*. 2005;182:1-15.
- 536 [39] Mukhopadhyay S, Gordon S. The role of scavenger receptors in pathogen recognition and  
537 innate immunity. *Immunobiology*. 2004;209:39-49.

- 538 [40] Benard EL, Roobol SJ, Spaink HP, et al. Phagocytosis of mycobacteria by zebrafish  
539 macrophages is dependent on the scavenger receptor Marco, a key control factor of pro-  
540 inflammatory signalling. *Dev Comp Immunol.* 2014;47:223-33.
- 541 [41] Thelen T, Hao Y, Medeiros AI, et al. The class A scavenger receptor, macrophage receptor with  
542 collagenous structure, is the major phagocytic receptor for *Clostridium sordellii* expressed by human  
543 decidual macrophages. *J Immunol.* 2010;185:4328-35.
- 544 [42] Villwock A, Schmitt C, Schielke S, et al. Recognition via the class A scavenger receptor  
545 modulates cytokine secretion by human dendritic cells after contact with *Neisseria meningitidis*.  
546 *Microbes and infection.* 2008;10:1158-65.
- 547 [43] Park SY, Jung MY, Lee SJ, et al. Stabilin-1 mediates phosphatidylserine-dependent clearance  
548 of cell corpses in alternatively activated macrophages. *J Cell Sci.* 2009;122:3365-73.
- 549 [44] Neu C, Sedlag A, Bayer C, et al. CD14-dependent monocyte isolation enhances phagocytosis  
550 of *Listeria monocytogenes* by proinflammatory, GM-CSF-derived macrophages. *PLoS One.*  
551 2013;8:e66898.
- 552 [45] Baer MT, Huang N, Gibson FC, 3rd. Scavenger receptor A is expressed by macrophages in  
553 response to *Porphyromonas gingivalis*, and participates in TNF- $\alpha$  expression. *Oral Microbiol*  
554 *Immunol.* 2009;24:456-63.
- 555 [46] Pluddemann A, Hoe JC, Makepeace K, et al. The macrophage scavenger receptor A is host-  
556 protective in experimental meningococcal septicaemia. *PLoS pathogens.* 2009;5:e1000297.
- 557 [47] Castleman MJ, Febbraio M, Hall PR. CD36 Is Essential for Regulation of the Host Innate  
558 Response to *Staphylococcus aureus*  $\alpha$ -Toxin-Mediated Dermonecrosis. *J Immunol.*  
559 2015;195:2294-302.
- 560 [48] Palani S, Elima K, Ekholm E, et al. Monocyte Stabilin-1 Suppresses the Activation of Th1  
561 Lymphocytes. *J Immunol.* 2016;196:115-23.
- 562 [49] Dalrymple SA, Lucian LA, Slattery R, et al. Interleukin-6-deficient mice are highly susceptible to  
563 *Listeria monocytogenes* infection: correlation with inefficient neutrophilia. *Infect Immun.*  
564 1995;63:2262-8.
- 565 [50] Rothe J, Lesslauer W, Lotscher H, et al. Mice lacking the tumour necrosis factor receptor 1 are  
566 resistant to TNF-mediated toxicity but highly susceptible to infection by *Listeria monocytogenes*.  
567 *Nature.* 1993;364:798-802.
- 568 [51] Silva RA, Appelberg R. Blocking the receptor for interleukin 10 protects mice from lethal  
569 listeriosis. *Antimicrob Agents Chemother.* 2001;45:1312-4.
- 570 [52] Stavru F, Archambaud C, Cossart P. Cell biology and immunology of *Listeria monocytogenes*  
571 infections: novel insights. *Immunol Rev.* 2011;240:160-84.
- 572 [53] Tsai YH, Disson O, Bierne H, et al. Murinization of internalin extends its receptor repertoire,  
573 altering *Listeria monocytogenes* cell tropism and host responses. *PLoS Pathog.* 2013;9:e1003381.
- 574 [54] Tokunaga R, Zhang W, Naseem M, et al. CXCL9, CXCL10, CXCL11/CXCR3 axis for immune  
575 activation - A target for novel cancer therapy. *Cancer Treat Rev.* 2018;63:40-7.

- 576 [55] Ohmori Y, Wyner L, Narumi S, et al. Tumor necrosis factor-alpha induces cell type and tissue-  
577 specific expression of chemoattractant cytokines in vivo. *Am J Pathol.* 1993;142:861-70.
- 578 [56] Cole AM, Ganz T, Liese AM, et al. Cutting edge: IFN-inducible ELR- CXC chemokines display  
579 defensin-like antimicrobial activity. *J Immunol.* 2001;167:623-7.
- 580 [57] Jia T, Serbina NV, Brandl K, et al. Additive roles for MCP-1 and MCP-3 in CCR2-mediated  
581 recruitment of inflammatory monocytes during *Listeria monocytogenes* infection. *J Immunol.*  
582 2008;180:6846-53.
- 583 [58] Witter AR, Okunnu BM, Berg RE. The Essential Role of Neutrophils during Infection with the  
584 Intracellular Bacterial Pathogen *Listeria monocytogenes*. *J Immunol.* 2016;197:1557-65.
- 585 [59] Hoffmann E, Machelart A, Song OR, et al. Proteomics of *Mycobacterium* Infection: Moving  
586 towards a Better Understanding of Pathogen-Driven Immunomodulation. *Front Immunol.* 2018;9:86.
- 587 [60] Edelson BT, Bradstreet TR, Hildner K, et al. CD8alpha(+) dendritic cells are an obligate cellular  
588 entry point for productive infection by *Listeria monocytogenes*. *Immunity.* 2011;35:236-48.
- 589 [61] Braun BJ, Slowik A, Leib SL, et al. The formyl peptide receptor like-1 and scavenger receptor  
590 MARCO are involved in glial cell activation in bacterial meningitis. *J Neuroinflammation.* 2011;8:11.
- 591 [62] Gao X, Zhao G, Li C, et al. LOX-1 and TLR4 affect each other and regulate the generation of  
592 ROS in *A. fumigatus* keratitis. *Int Immunopharmacol.* 2016;40:392-9.
- 593 [63] Gomes IN, Palma LC, Campos GO, et al. The scavenger receptor MARCO is involved in  
594 *Leishmania major* infection by CBA/J macrophages. *Parasite Immunol.* 2009;31:188-98.
- 595
- 596

597 **FIGURE LEGENDS**

598

599 **Figure 1.** SRs are required for *Lm* uptake by macrophages. (A-B) Chemical saturation of SRs impairs  
600 bacterial uptake by macrophages-like cells. (A) Human THP-1, (B) murine Raw and J774  
601 macrophage-like cells were left untreated or pre-treated with fucoidan, Poly(I) and its control Poly(C),  
602 infected by *Lm* for 30 min, incubated with gentamicin, washed and lysed to quantify intracellular  
603 bacteria. Values are expressed relative to values in non-treated cells, arbitrarily fixed to 100%.  
604 Values are mean  $\pm$  SD of three independent assays. \* $p$ <0.05; \*\* $p$ <0.01; \*\*\* $p$ <0.001. (C) SR gene  
605 expression was assessed by RT-PCR analysis on THP-1, Raw and J774 total RNAs, using *HPRT1*  
606 as reference gene. Band panel for each cell line is representative of two assays.

607

608 **Figure 2.** STAB-1 is required for *Lm* uptake by macrophages. (A) Impact of STAB-1 on *Lm* adhesion  
609 and entry into macrophages. Raw were pre-treated with an anti-IgG (SC-2025) or anti-STAB-1  
610 antibody, at 5  $\mu$ g/ml and 25  $\mu$ g/ml (sc-98788) before *Lm* infection. Adherent and intracellular bacteria  
611 were quantified. Values are expressed relative to values in IgG-treated cells, arbitrarily fixed to 100%.  
612 (B) Quantification of intracellular bacteria in WT and STAB-1 KO BMDMs infected with *Lm* for 30  
613 min. Values are expressed relative to WT arbitrarily fixed to 100%. (C) Immunofluorescence images  
614 of WT and STAB-1 KO BMDMs infected with *Lm*-GFP (green) for 30 min. Actin is labelled with  
615 TRITC-conjugated phalloidin. Scale bar, 10  $\mu$ m. Quantification of the percentage of cells with  
616 intracellular *Lm* and of the number of intracellular *Lm* in BMDMs upon 30 min of infection. Values  
617 are mean  $\pm$  SD of three to four independent experiments. Statistical significance is indicated as  
618 compared to WT BMDMs. \* $p$ <0.05; \*\* $p$ <0.01. (D) Quantification of intracellular *Li*, the percentage of  
619 cells with beads and the number of intracellular beads per cell in WT and STAB-1 KO BMDMs  
620 infected for 30 min. Values are mean  $\pm$  SD of three independent experiments. Statistical significance  
621 is indicated as compared to WT BMDMs. \* $p$ <0.05; \*\* $p$ <0.01

622

623 **Figure 3.** STAB-1 have a protective role against *Lm* infection. (A) Quantification of viable bacteria in  
624 spleens and livers recovered from WT and STAB-1 KO mice, three days after intravenous infection  
625 of  $5 \times 10^5$  CFU of *Lm*. Data are presented as scatter plots, each animal is represented by a dot and

626 the mean is indicated by a horizontal line. (B) WT and STAB-1 KO mice survival after intravenous  
627 inoculation of  $10^5$  CFU of *Lm* (n=5). \* $p$ <0.05.

628

629 **Figure 4.** STAB-1 is required for an efficient inflammatory response and immune cell accumulation  
630 in *Lm*-infected spleens. (A) WT and STAB-1 KO mice were intravenously infected with  $5 \times 10^5$  CFU  
631 of *Lm*. Mice were sacrificed at day three post-infection and spleen, liver and serum were collected.  
632 Levels of TNF- $\alpha$ , IL-6 and IL-10 were measured by ELISA. Data are represented as an average of  
633 ten mice from two independent experiments per group. \* $p$ <0.05; \*\* $p$ <0.01; \*\*\* $p$ <0.001. (B) Spleen  
634 cells from *Lm* ( $5 \times 10^5$  CFU) infected WT and STAB-1 KO mice were isolated and analysed by flow  
635 cytometry. Total numbers of myeloid cells (CD11b<sup>int/hi</sup>), neutrophils (CD11b<sup>hi</sup>Ly6G<sup>hi</sup>), dendritic cells  
636 (CD11b<sup>int</sup>CD11c<sup>hi</sup>), macrophages (CD11b<sup>hi</sup>CD11c<sup>lo</sup>) and inflammatory macrophages  
637 (CD11b<sup>hi</sup>Ly6C<sup>hi</sup>) are shown. Data are presented as scatter plots, with each animal represented by a  
638 dot and the mean indicated by a horizontal line. \* $p$ <0.05; \*\* $p$ <0.01. (C) WT and STAB-1 KO mice  
639 were intravenously infected with  $5 \times 10^5$  CFU of *Lm*. Mice were sacrificed at day three post-infection  
640 to recover spleens and livers. The expression of chemokines CCL2, CXCL10 and CCL7 was  
641 quantified by qRT-PCR. Data are represented as an average of ten mice from two independent  
642 experiments per group. \* $p$ <0.05; \*\* $p$ <0.01; \*\*\* $p$ <0.001.

643

644 **Figure 5.** STAB-1 is important for early myeloid cells recruitment in response to *Lm* infection. (A-D)  
645 Single-cell suspensions recovered from the peritoneal cavity of WT and STAB-1 KO mice were  
646 analysed by flow cytometry to evaluate cell populations. (A) Non-infected animals. (B-C) Mice  
647 intraperitoneally infected with  $10^5$  CFU of *Lm* for (B) 6 h or (C) 24 h. (D) Mice intraperitoneally injected  
648 with purified LTA (5 mg/ml) for 6 h. Data are represented as an average of two independent  
649 experiments, with at least six mice per group. \* $p$ <0.05; \*\*\* $p$ <0.001

650

651 **Figure 6.** STAB-1 expression is decreased and re-localized in response to *Lm* infection. (A)  
652 Assessment of STAB-1 expression by (A) quantitative RT-PCR and (B) Western Blot. (A)  
653 Quantification of STAB-1 mRNA levels on RNAs extracted from J774 and BMDMs infected with *Lm*  
654 for 30 min. STAB-1 expression levels in infected conditions were normalized to those in non-infected



655 BMDMs, arbitrarily fixed to 1. (B-D) Independent immunoblots to detect STAB-1 protein in (B)  
656 BMDMs left uninfected (NI) or infected with *Lm* or *Li* for 30 min, (C) spleen of NI and *Lm*-infected  
657 mice for three days ( $5 \times 10^5$  CFU), (D) NI and *Lm*-infected HUVECs. Immunoblots quantification of  
658 STAB-1 signal intensity in NI and infected conditions, normalized to GAPDH. (E)  
659 Immunofluorescence images of NI and *Lm* infected HUVECs, stained with an anti-STAB-1 antibody.  
660 DNA counterstained with DAPI and actin labelled with TRITC-conjugated phalloidin. Scale bar, 10  
661  $\mu\text{m}$ . (F) Immunoblots to detect STAB-1 protein in the cytoplasmic and membrane fractions of NI and  
662 *Lm*-infected HUVECs upon cell fractioning. cMet was used as a membrane loading protein control  
663 and GAPDH as a cytoplasmic loading protein control. Immunoblots quantification of STAB-1 signal  
664 intensity in NI and infected conditions, normalized to cMet or GAPDH.

665

666 **Figure S1.** STAB-1 KO mice do not have significant defect on cytokine production. Cytokine  
667 production (TNF- $\alpha$ , IL-6, IL-10) in spleen, liver and serum from non-infected WT and STAB-1 KO  
668 mice was quantified by ELISA (n=3).

669

670 **Figure S2.** STAB-1 KO mice do not have significant defect on myeloid cell population. Spleen cells  
671 from non-infected WT and STAB-1 KO mice were isolated and analysed by flow cytometry to  
672 evaluate cell populations. Total numbers of myeloid cells (CD11b<sup>int/hi</sup>), neutrophils (CD11b<sup>hi</sup>Ly6G<sup>hi</sup>),  
673 dendritic cells (CD11b<sup>int</sup>CD11c<sup>hi</sup>), macrophages (CD11b<sup>hi</sup>CD11c<sup>lo</sup>) and inflammatory macrophages  
674 (CD11b<sup>hi</sup>Ly6C<sup>hi</sup>) are shown. Data are presented as scatter plots, with each animal represented by a  
675 dot and the mean indicated by a horizontal line.

676

677

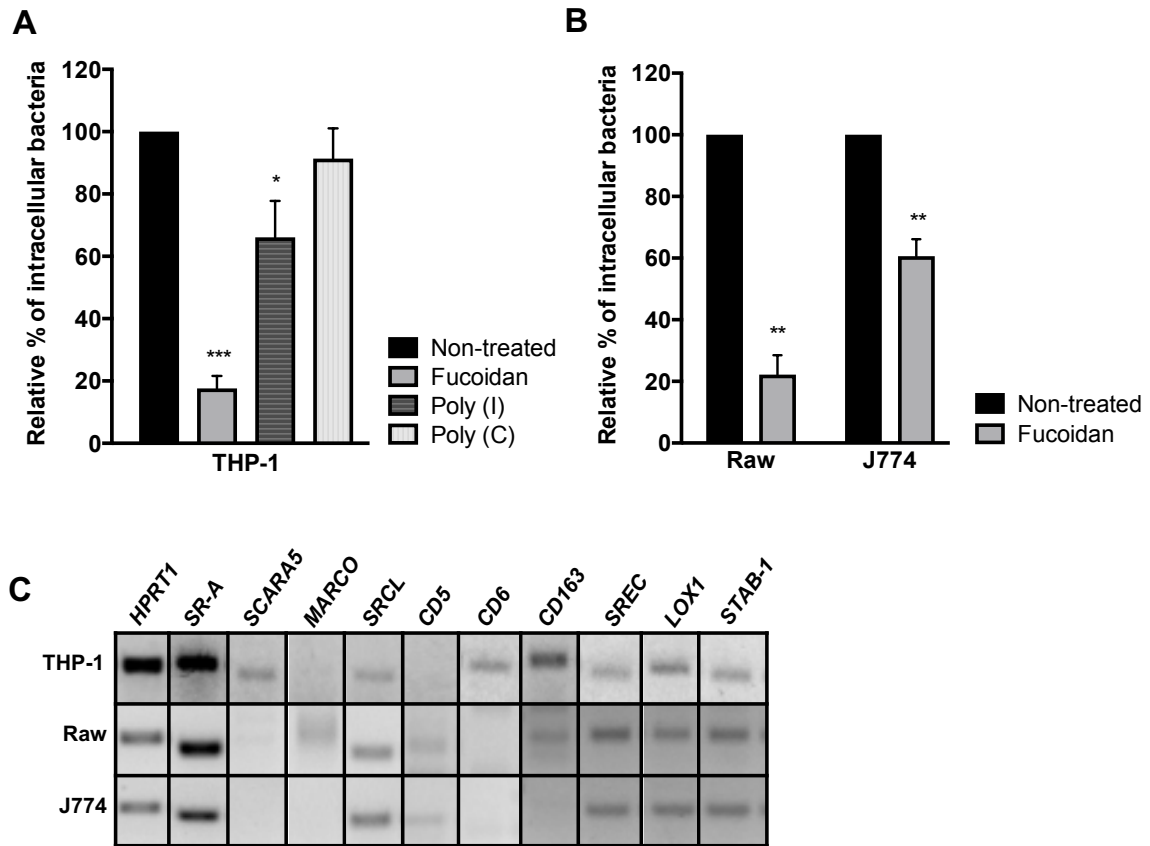

**Figure 1.** SRs are required for *Lm* uptake by macrophages



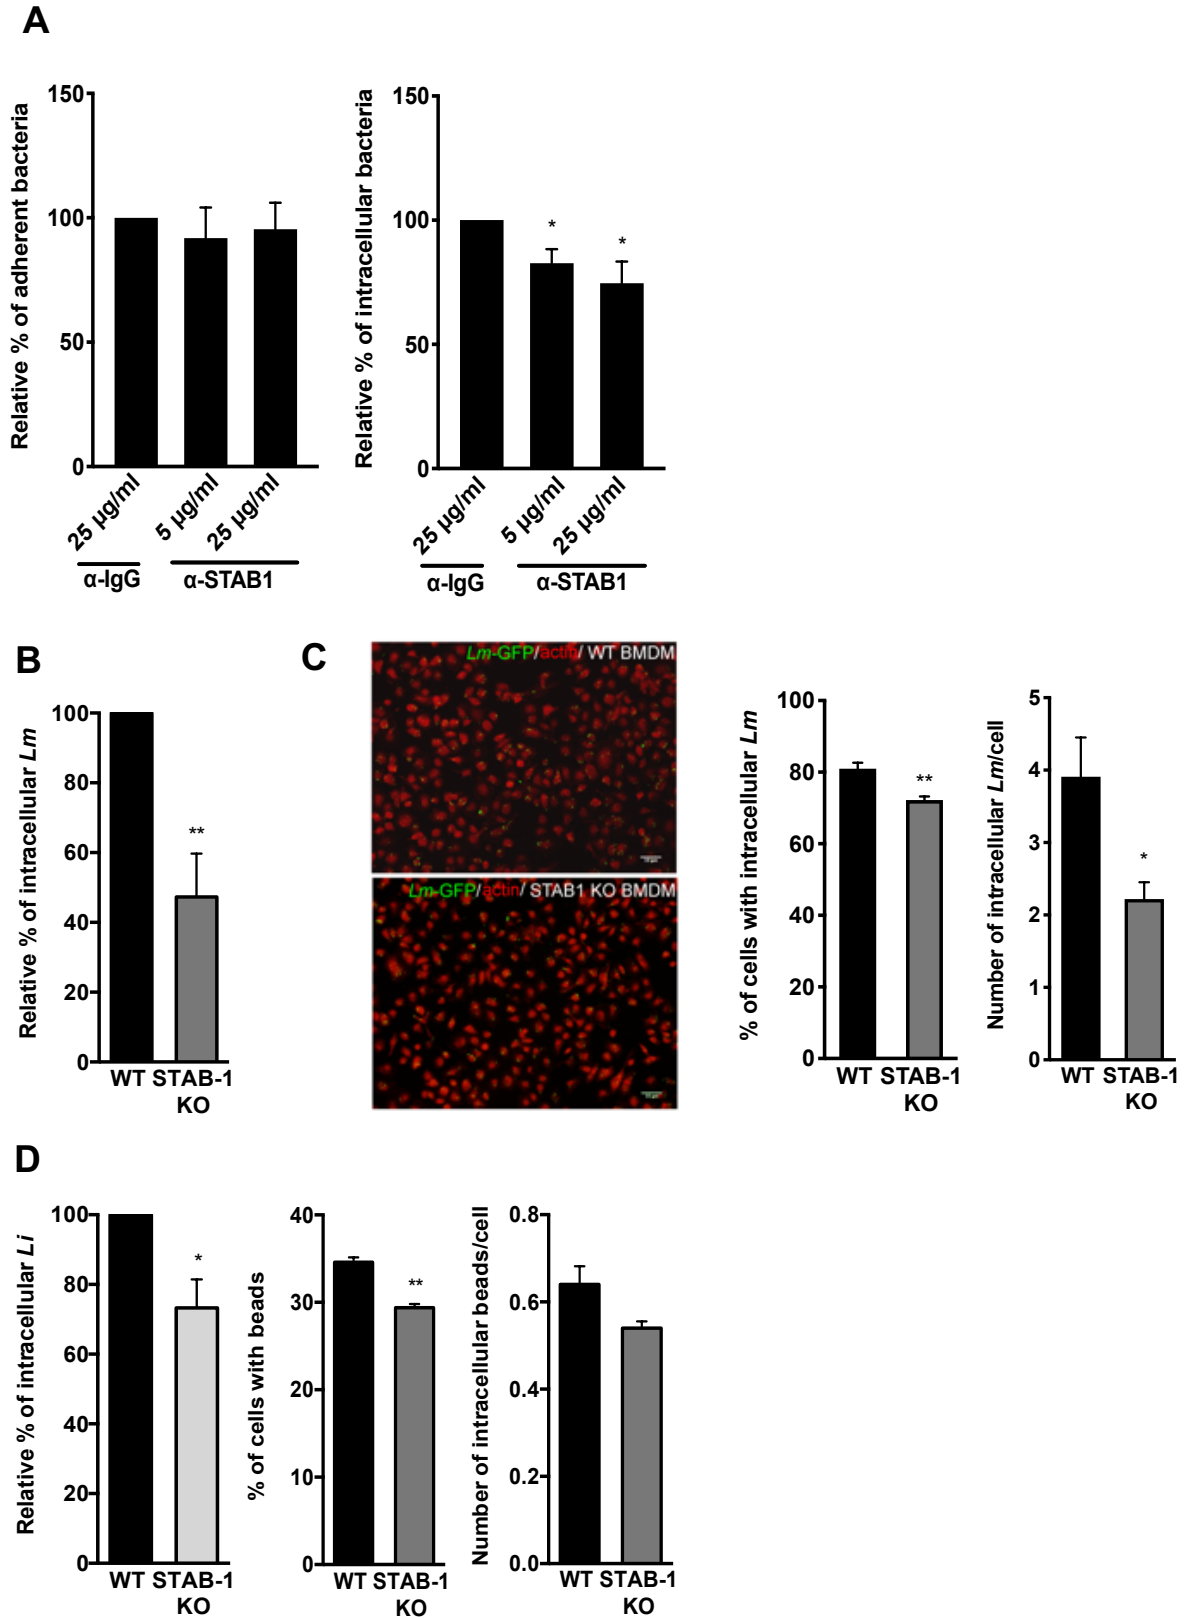

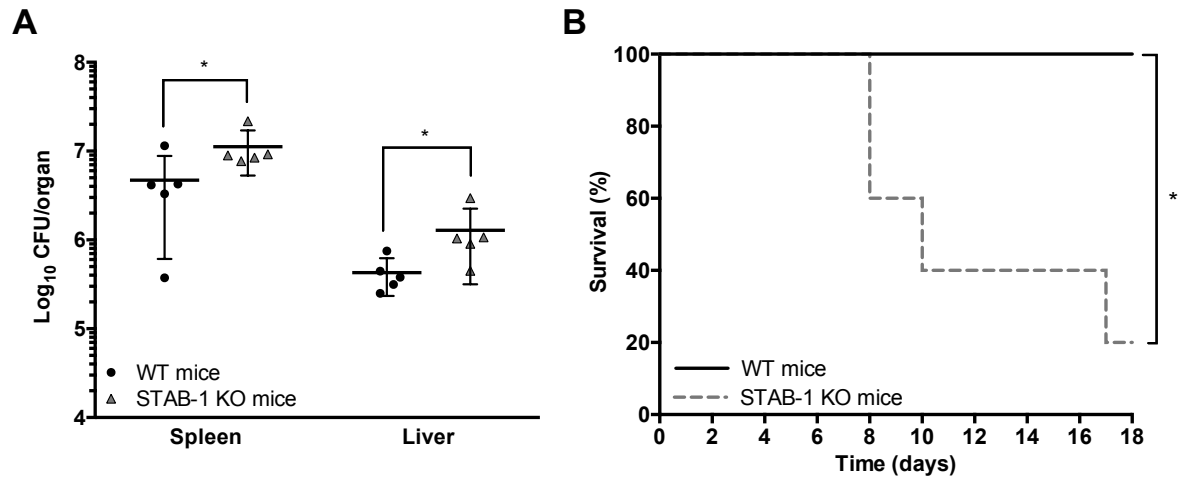

**Figure 3.** STAB-1 has a protective role against *Lm* infection

**A**

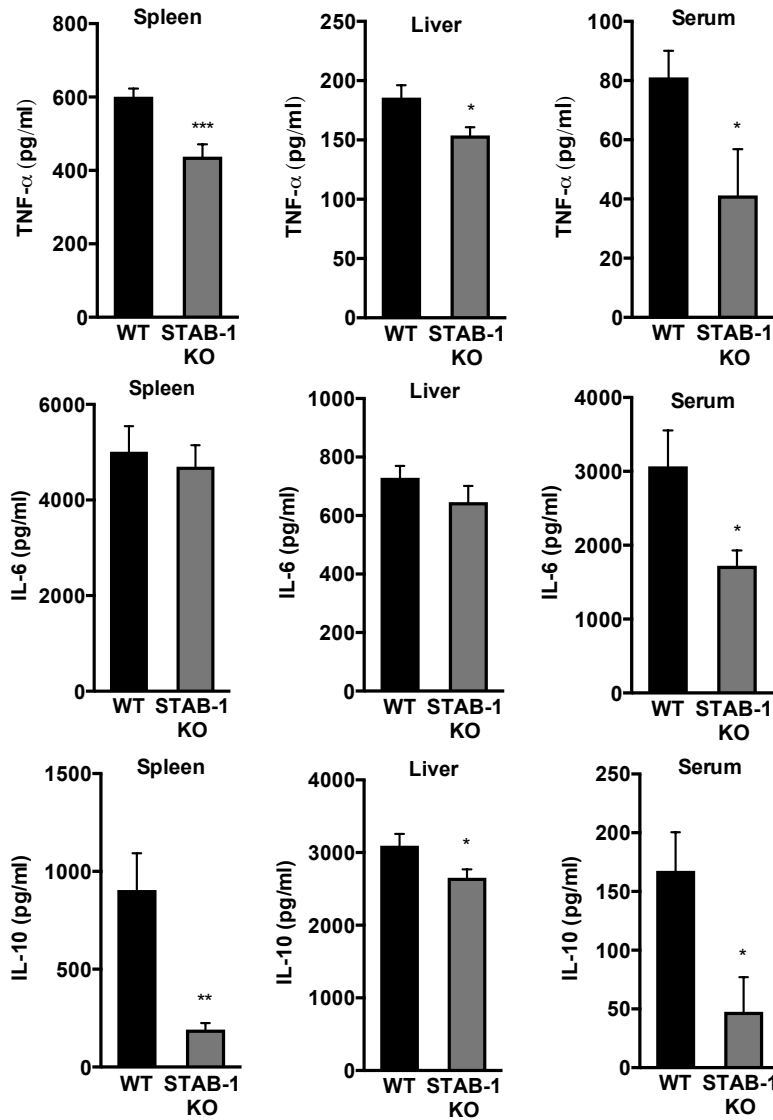

**B**

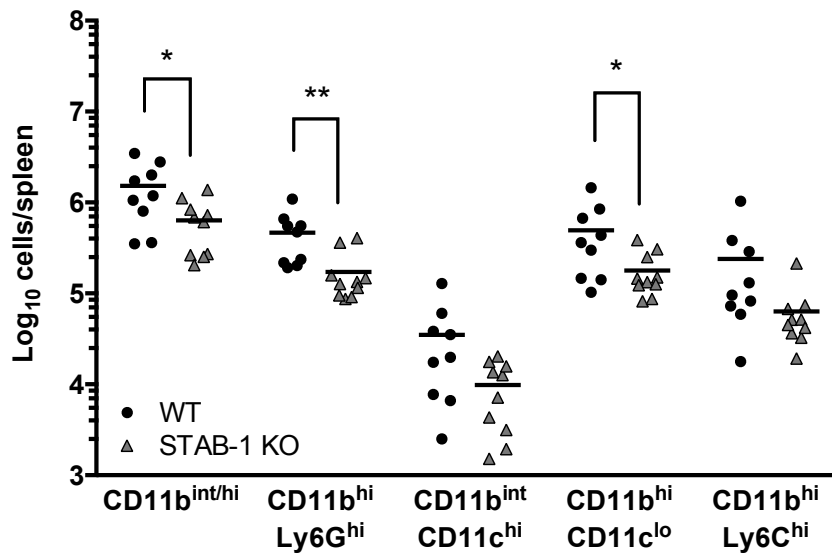

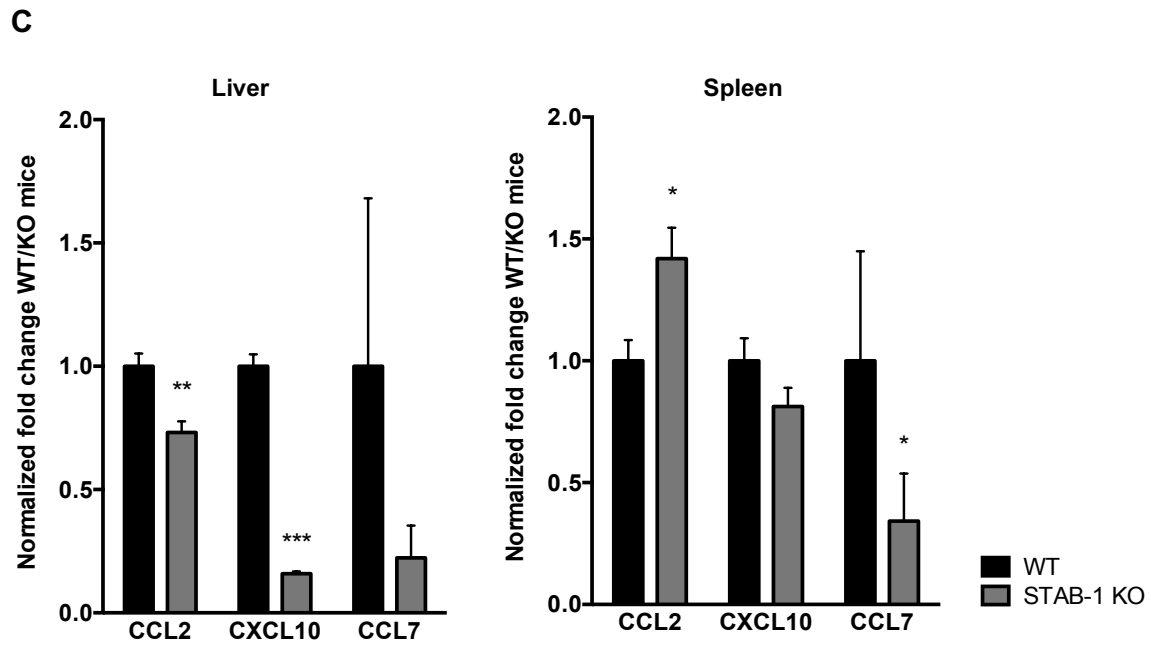

**Figure 4.** STAB-1 is required for an efficient inflammatory response and immune cell accumulation in *Lm*-infected spleens

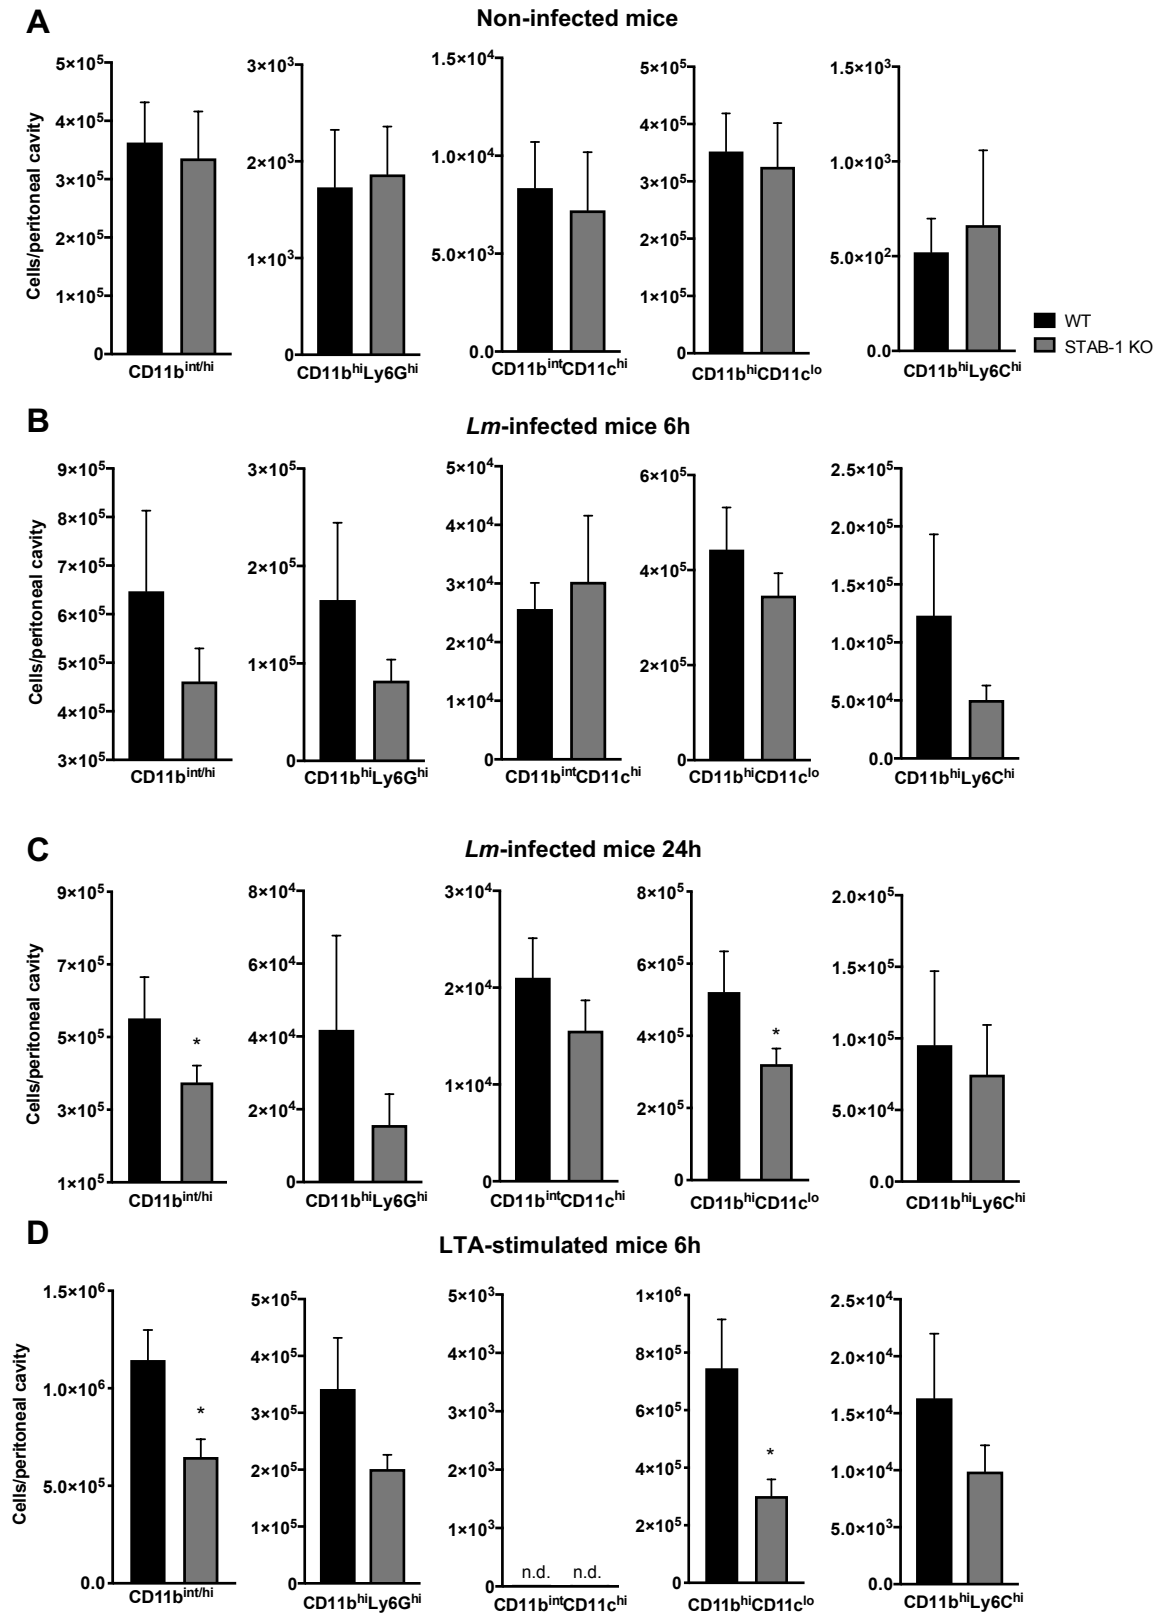

**Figure 5.** STAB-1 is important for early myeloid cells recruitment in response to *Lm* infection

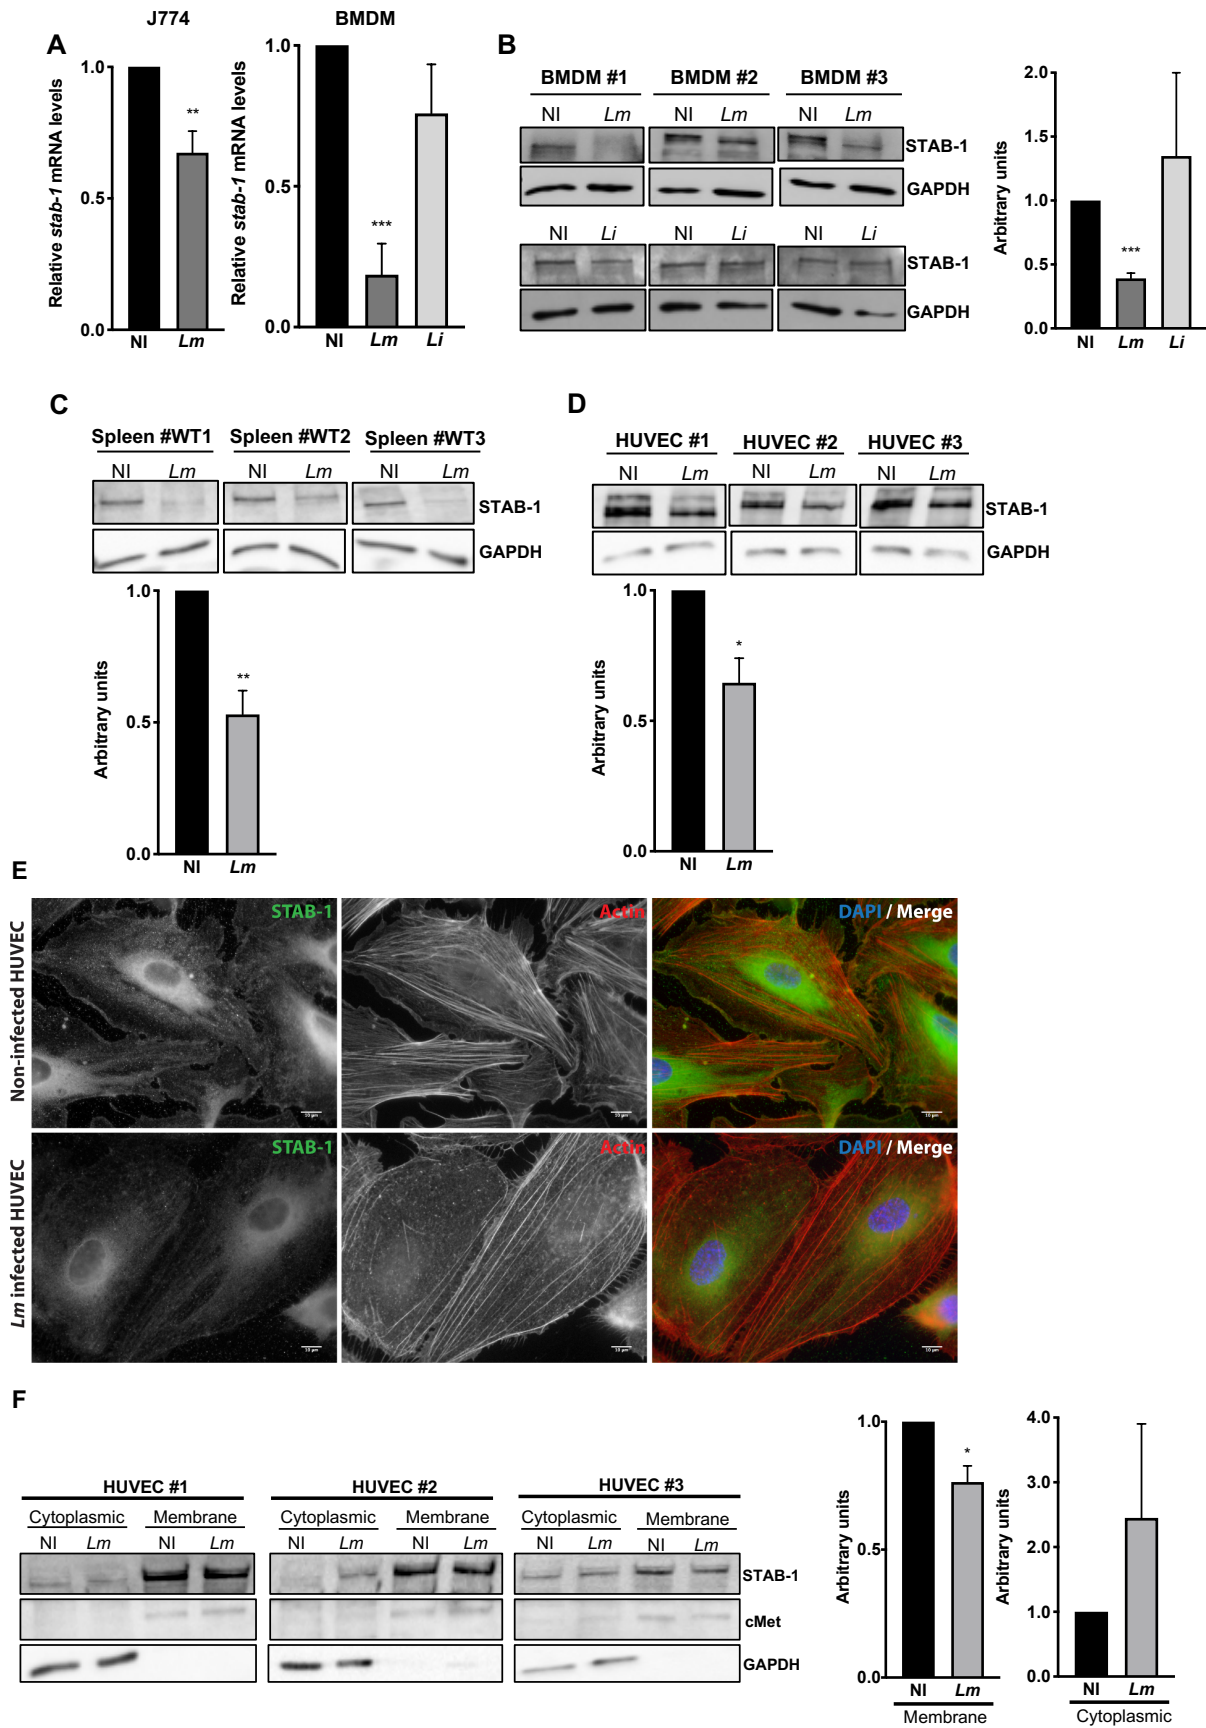

**Figure 6.** *STAB-1* expression is decreased and re-localized in response to *Lm* infection

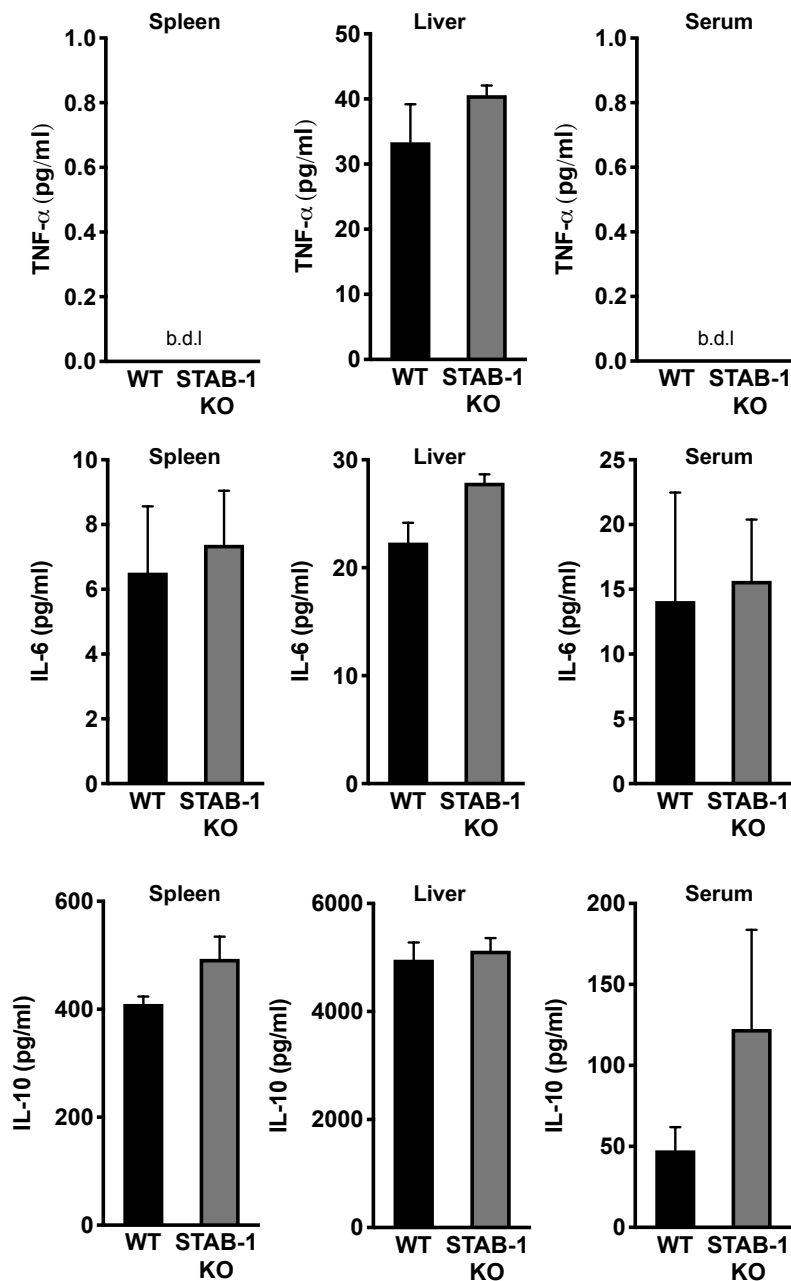

**Figure S1.** *STAB-1* KO mice do not have significant defect on cytokine production

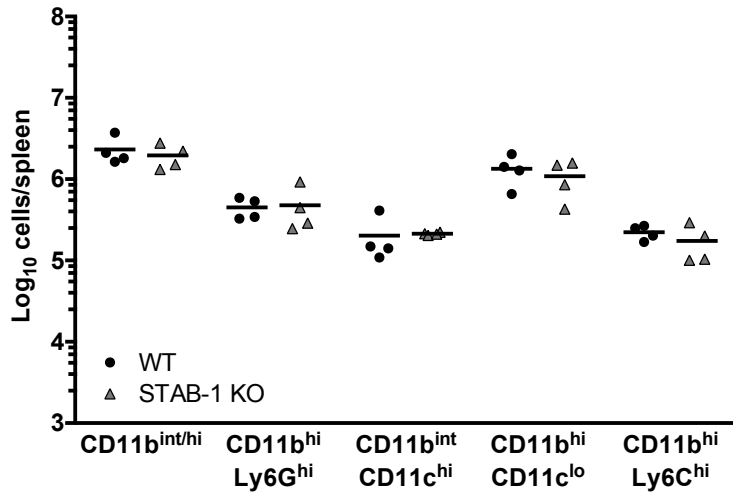

**Figure S2.** STAB-1 KO mice do not have significant defect on myeloid cell population



**Table S1 Primers**

| Primer       | Sequence (5' to 3')       | Primer                                                 | Sequence (5' to 3')    |
|--------------|---------------------------|--------------------------------------------------------|------------------------|
| hHPRT1 Fw    | GCGTCGTGATTAGTGATG        | mHPRT1 Fw                                              | TGATTAGCGATGATGAACCA   |
| hHPRT1 Rv    | CACCCTTTCCAAATCCTCAG      | mHPRT1 Rv                                              | GTCTTCAGTCCTGTCCATAA   |
| hSRA Fw      | TTGAATACCACATTGCTTGATT    | mSRA Fw                                                | CTGAATATGACACTGCTTGATG |
| hSRA Rv      | CTGATTCCTCTTGTGTTTGA      | mSRA Rv                                                | ATTACTGATGTCCTCCTGTTG  |
| hSCARA5 Fw   | TTCATCTTAGCAGTGCCAG       | mSCARA5 Fw                                             | GTGAGTGACCGTGACAAC     |
| hSCARA5 Rv   | ATTCAGCCGGTTCACATT        | mSCARA5 Rv                                             | GTGACATGGACCATCCTC     |
| hMARCO Fw    | AGAAAATTCTCAAGGAGGACGA    | mMARCO Fw                                              | GTGTGAAAGGAAGCAAGG     |
| hMARCO Rv    | TTGGGCTTTGGAACATTGATTT    | mMARCO Rv                                              | CTACAAGACCTGGGACTC     |
| hSRCL Fw     | AGTAGCCAACCTATCAGTGATTATG | mSRCL Fw                                               | TCAGTGGTTATGGAAGAGATG  |
| hSRCL Rv     | CGGTGGACCTTGTAGTATTGTA    | mSRCL Rv                                               | CAGGAGGACCTTGTAGAATG   |
| hCD5 Fw      | TGAAGAAATTCGCCAGAAG       | mCD5 Fw                                                | GTCTGCTTATCCAGCTCTG    |
| hCD5 Rv      | GGTTGCGATGGAAAGACAT       | mCD5 Rv                                                | AGGTCATAGTCACTGTCAG    |
| hCD6 Fw      | GTTCAGACAGTCACTATAGAATCT  | mCD6 Fw                                                | TTCCAGTCACGATAGAATCTTC |
| hCD6 Rv      | AGGGGATGAGGAGCATTAG       | mCD6 Rv                                                | AGGACAATACAGAGAATGAGAA |
| hCD163 Fw    | AACTTGAGTCCCTTCACCAT      | mCD163 Fw                                              | GTGTGATTTGCTTAGAGGGA   |
| hCD163 Rv    | TTGTCTGTTCCCTCCAAGAGAA    | mCD163 Rv                                              | CACTTCCAATCTTCCTGAACA  |
| hSREC Fw     | ACTCCTTCTCATCCGATCC       | mSREC Fw                                               | TTCTTCTGATCCTGACTC     |
| hSREC Rv     | GGACCATCCCTTCTTGGG        | mSREC Rv                                               | CATAGGGACCATCTCTTCTC   |
| hLOX1 Fw     | AAAGCTAAAGTCTTCAGTTTC     | mLOX1 Fw                                               | CCTGCTGCTATGACTCTG     |
| hLOX1 Rv     | CATAATGGTCACTACTAATCCC    | mLOX1 Rv                                               | ATACCTGGCGTAATTGTGT    |
| hSTAB1 Fw    | TAACCAATTACGAAATACTCCTA   | mSTAB1 Fw                                              | AGGGGACTCCAAGAAAAC     |
| hSTAB1 Rv    | CCATTAGCTGCTATGTTGTTG     | mSTAB1 Rv                                              | CCACAGTTCTCCAGGATC     |
| TNF alpha Fw | CCAAAGGGATGAGAAGTTC       | <b>Primer-probe set reference (Applied Biosystems)</b> |                        |
| TNF alpha Rv | GAGAAGATGATCTGAGTGTG      | HPRT1                                                  | Mm00446968_m1          |
| IL-6 Fw      | GACCTGTCTATACCACTTCAC     | CCL2                                                   | Mm00441242_m1          |
| IL-6 Rv      | GCCATTGCACAACCTTTTC       | CXCL10                                                 | Mm99999072_m1          |
| IL-10 Fw     | AGCCAGGTGAAGACTTTCT       | CXCL7                                                  | Mm00443113_m1          |
| IL-10 Rv     | GCAACCCAAGTAACCCTTAAAG    |                                                        |                        |
